# Supplementary material for: What Matters in Weight Loss? An In-Depth Analysis of Self-Monitoring
Source: PubMed Central journal article supplement (PMC5446667; doi:10.2196/jmir.7457), 2017-05-12
Supplement: jmir_v19i5e160_app4.pdf [file jmir_v19i5e160_app4.pdf]

## Supplementary Tables

Table S1. Baseline demographics

| Demographics                    | All Participants<br>Mean (SD)<br>(n = 3116) | Completers<br>Mean (SD)<br>(n=2113, 41%) | Non-completers<br>Mean (SD)<br>(n=1253, 59%) | P-value        |
|---------------------------------|---------------------------------------------|------------------------------------------|----------------------------------------------|----------------|
| Age, years                      | 43.70 (10.77)                               | 44.54 (10.72)                            | 42.01 (10.69)                                | < <b>0.001</b> |
| Starting Weight, kilograms      | 99.25 (22.73)                               | 99.76 (22.92)                            | 98.22 (22.32)                                | 0.071          |
| Starting BMI, kg/m <sup>2</sup> | 33.79 (6.72)                                | 33.84 (6.80)                             | 33.69 (6.56)                                 | 0.551          |

Table S2. Weight-loss outcomes of participants with different weekly weigh-in frequency

| Weigh-in Frequency per week | Overall   |                         | Female    |                         | Male      |                         | p-value      |
|-----------------------------|-----------|-------------------------|-----------|-------------------------|-----------|-------------------------|--------------|
|                             | N (%)     | Weight Loss % Mean (SE) | N (%)     | Weight Loss % Mean (SE) | N (%)     | Weight Loss % Mean (SE) |              |
| Less than 1                 | 89 (4%)   | -3.41 (0.58)            | 46 (4%)   | -3.87% (0.77)           | 43 (5%)   | -2.93% (0.87)           | 0.420        |
| 1 to 3                      | 636 (30%) | -4.08 (0.20)            | 375 (30%) | -3.82% (0.26)           | 261 (30%) | -4.44% (0.31)           | 0.126        |
| 3 to 5                      | 690 (33%) | -5.09 (0.19)            | 392 (31%) | -4.75% (0.26)           | 298 (35%) | -5.52% (0.28)           | <b>0.042</b> |
| 5 or more                   | 698 (33%) | -7.82 (0.20)            | 440 (35%) | -7.53% (0.25)           | 258 (30%) | -8.30% (0.34)           | 0.066        |
| p-value                     |           | < <b>0.0001</b>         |           | < <b>0.0001</b>         |           | < <b>0.0001</b>         |              |

Table S3. Weigh-in frequency of participants with different levels of outcome at 6 months

| Outcome Levels | Overall    |                         | Female    |                         | Male      |                         | <i>p-value</i> |
|----------------|------------|-------------------------|-----------|-------------------------|-----------|-------------------------|----------------|
|                | N (%)      | Weigh-in/Week Mean (SE) | N (%)     | Weigh-in/Week Mean (SE) | N (%)     | Weigh-in/Week Mean (SE) |                |
| Loss ≥ 10%     | 388 (18%)  | 4.70 (0.09)             | 220 (18%) | 4.89 (0.12)             | 168 (20%) | 4.44 (0.14)             | <b>0.013</b>   |
| Loss 5-10%     | 707 (34%)  | 4.21 (0.07)             | 406 (32%) | 4.22 (0.09)             | 301 (35%) | 4.18 (0.10)             | 0.741          |
| Loss < 5%      | 1018 (48%) | 3.40 (0.05)             | 628 (50%) | 3.53 (0.07)             | 392 (45%) | 3.19 (0.08)             | <b>0.001</b>   |
| <i>p-value</i> |            | <b>&lt; 0.0001</b>      |           | <b>&lt; 0.0001</b>      |           | <b>&lt; 0.0001</b>      |                |

Table S4. Weight-loss outcomes of participants with different daily step counts

| Steps per Day  | Overall   |                         | Female    |                         | Male      |                         | <i>p-value</i> |
|----------------|-----------|-------------------------|-----------|-------------------------|-----------|-------------------------|----------------|
|                | N (%)     | Weight Loss % Mean (SE) | N (%)     | Weight Loss % Mean (SE) | N (%)     | Weight Loss % Mean (SE) |                |
| Less than 5K   | 797 (38%) | -3.68% (0.17)           | 494 (40%) | -3.68% (0.22)           | 303 (35%) | -3.67% (0.27)           | 0.977          |
| 5K to 7.5K     | 604 (29%) | -5.56% (0.20)           | 375 (30%) | -5.45% (0.25)           | 229 (27%) | -5.73% (0.32)           | 0.487          |
| 7.5K to 10K    | 429 (20%) | -7.03% (0.26)           | 242 (19%) | -6.94% (0.36)           | 187 (22%) | -7.15% (0.36)           | 0.685          |
| 10K or more    | 283 (13%) | -9.03% (0.34)           | 142 (11%) | -8.76% (0.47)           | 141 (16%) | -9.31% (0.49)           | 0.417          |
| <i>p-value</i> |           | <b>&lt; 0.0001</b>      |           | <b>&lt; 0.0001</b>      |           | <b>&lt; 0.0001</b>      |                |

Table S5. Daily step counts of clients with different levels of outcome at 6 months

| Outcome Levels | Overall    |                     | Female    |                     | Male      |                         | <i>p-value</i> |
|----------------|------------|---------------------|-----------|---------------------|-----------|-------------------------|----------------|
|                | N (%)      | Steps/Day Mean (SE) | N (%)     | Steps/Day Mean (SE) | N (%)     | Weigh-in/Week Mean (SE) |                |
| Loss ≥ 10%     | 388 (18%)  | 8077 (171.52)       | 220 (18%) | 7839 (214)          | 168 (20%) | 8390 (279)              | 0.119          |
| Loss 5-10%     | 707 (34%)  | 6657 (117.13)       | 406 (32%) | 6390 (148)          | 301 (35%) | 7017 (187)              | <b>0.009</b>   |
| Loss < 5%      | 1018 (48%) | 5277 (95.08)        | 628 (50%) | 5240 (114)          | 392 (45%) | 5335 (168)              | 0.639          |
| <i>p-value</i> |            | <b>&lt; 0.0001</b>  |           | <b>&lt; 0.0001</b>  |           | <b>&lt; 0.0001</b>      |                |

Table S6. Weight-loss outcomes of participants with different Highly active minutes per week

| Highly Active Min. Per Week | Overall   |                         | Female    |                         | Male      |                         | <i>p-value</i> |
|-----------------------------|-----------|-------------------------|-----------|-------------------------|-----------|-------------------------|----------------|
|                             | N (%)     | Weight Loss % Mean (SE) | N (%)     | Weight Loss % Mean (SE) | N (%)     | Weight Loss % Mean (SE) |                |
| Less than 60                | 897 (42%) | -4.14 (0.17)            | 624 (50%) | -4.20% (0.21)           | 273 (32%) | -4.01% (0.32)           | 0.614          |
| 60 to 120                   | 525 (25%) | -5.71 (0.21)            | 334 (27%) | -5.74% (0.26)           | 191 (22%) | -5.65% (0.33)           | 0.832          |
| 120 to 180                  | 299 (14%) | -5.85 (0.29)            | 158 (12%) | -6.33% (0.42)           | 141 (16%) | -5.32% (0.40)           | 0.81           |
| 180 or more                 | 394 (19%) | -8.64 (0.28)            | 138 (11%) | -9.04% (0.50)           | 256 (30%) | -8.42% (0.34)           | 0.308          |
| <i>p-value</i>              |           | <b>&lt; 0.0001</b>      |           | <b>&lt; 0.0001</b>      |           | <b>&lt; 0.0001</b>      |                |

Table S7. Highly active minutes per week of clients with different levels of outcome at 6 months

| Outcome Levels | Overall    |                                   | Female    |                                   | Male      |                                   | <i>p-value</i>     |
|----------------|------------|-----------------------------------|-----------|-----------------------------------|-----------|-----------------------------------|--------------------|
|                | N (%)      | Highly Active Mins/Week Mean (SE) | N (%)     | Highly Active Mins/Week Mean (SE) | N (%)     | Highly Active Mins/Week Mean (SE) |                    |
| Loss ≥ 10%     | 388 (18%)  | 154 (6.47)                        | 220 (18%) | 126 (7.48)                        | 168 (20%) | 192 (10.63)                       | <b>&lt; 0.0001</b> |
| Loss 5-10%     | 707 (34%)  | 116 (3.91)                        | 406 (32%) | 90 (4.03)                         | 301 (35%) | 151 (6.92)                        | <b>&lt; 0.0001</b> |
| Loss < 5%      | 1018 (48%) | 79 (2.53)                         | 628 (50%) | 65 (2.50)                         | 392 (45%) | 102 (4.99)                        | <b>&lt; 0.0001</b> |
| <i>p-value</i> |            | <b>&lt; 0.0001</b>                |           | <b>&lt; 0.0001</b>                |           | <b>&lt; 0.0001</b>                |                    |

Table S8. Weight-loss outcomes of participants with different number of food log days per week

| Food Log Days Per Week | Overall   |                         | Female    |                         | Male      |                         | <i>p-value</i> |
|------------------------|-----------|-------------------------|-----------|-------------------------|-----------|-------------------------|----------------|
|                        | N (%)     | Weight Loss % Mean (SE) | N (%)     | Weight Loss % Mean (SE) | N (%)     | Weight Loss % Mean (SE) |                |
| Less than 1            | 316 (15%) | -3.67 (0.33)            | 146 (12%) | -3.13 (0.50)            | 170 (20%) | -4.14 (0.44)            | 0.129          |
| 1 to 3                 | 596 (28%) | -4.32 (0.20)            | 357 (28%) | -4.11 (0.26)            | 239 (28%) | -4.64 (0.30)            | 0.188          |
| 3 to 5                 | 565 (27%) | -5.15 (0.19)            | 363 (29%) | -4.99 (0.25)            | 202 (23%) | -5.45 (0.31)            | 0.249          |
| 5 or more              | 636 (30%) | -8.20 (0.21)            | 387 (31%) | -7.88 (0.27)            | 249 (29%) | -8.68 (0.34)            | 0.065          |
| <i>p-value</i>         |           | <b>&lt; 0.0001</b>      |           | <b>&lt; 0.0001</b>      |           | <b>&lt; 0.0001</b>      |                |

Table S9. Food log days per week of clients with different levels of outcome at 6 months

| Outcome Levels | Overall    |                              | Female    |                              | Male      |                              | <i>p-value</i> |
|----------------|------------|------------------------------|-----------|------------------------------|-----------|------------------------------|----------------|
|                | N (%)      | Food Log Days/Week Mean (SE) | N (%)     | Food Log Days/Week Mean (SE) | N (%)     | Food Log Days/Week Mean (SE) |                |
| Loss ≥ 10%     | 388 (18%)  | 4.44 (0.11)                  | 220 (18%) | 4.64 (0.14)                  | 168 (20%) | 4.18 (0.19)                  | 0.051          |
| Loss 5-10%     | 707 (34%)  | 3.92 (0.08)                  | 406 (32%) | 4.01 (0.10)                  | 301 (35%) | 3.80 (0.13)                  | 0.182          |
| Loss < 5%      | 1018 (48%) | 2.90 (0.60)                  | 628 (50%) | 3.08 (0.07)                  | 392 (45%) | 2.62 (0.10)                  | <b>0.0003</b>  |
| <i>p-value</i> |            | <b>&lt; 0.0001</b>           |           | <b>&lt; 0.0001</b>           |           | <b>&lt; 0.0001</b>           |                |

Table S10. Percentage of five food log weeks in clients with different levels of outcome at 6 months

| Outcome Levels | Overall    |                                  | Female    |                                  | Male      |                                  | <i>p-value</i> |
|----------------|------------|----------------------------------|-----------|----------------------------------|-----------|----------------------------------|----------------|
|                | N (%)      | % of 5x Food-log Weeks Mean (SE) | N (%)     | % of 5x Food-log Weeks Mean (SE) | N (%)     | % of 5x Food-log Weeks Mean (SE) |                |
| Loss ≥ 10%     | 388 (18%)  | 69.40 (1.72)                     | 220 (18%) | 72.55 (2.13)                     | 168 (20%) | 65.26 (2.81)                     | <b>0.039</b>   |
| Loss 5-10%     | 707 (34%)  | 63.61 (1.20)                     | 406 (32%) | 65.37 (1.52)                     | 301 (35%) | 61.25 (1.93)                     | 0.094          |
| Loss < 5%      | 1018 (48%) | 49.14 (0.97)                     | 628 (50%) | 51.91 (1.19)                     | 392 (45%) | 44.70 (1.61)                     | <b>0.0003</b>  |
| <i>p-value</i> |            | <b>&lt; 0.0001</b>               |           | <b>&lt; 0.0001</b>               |           | <b>&lt; 0.0001</b>               |                |

Table S11. Weight-loss outcomes of participants with different number of food logs per week

| Food Logs Per Week | Overall   |                         | Female    |                         | Male      |                         | <i>p-value</i> |
|--------------------|-----------|-------------------------|-----------|-------------------------|-----------|-------------------------|----------------|
|                    | N (%)     | Weight Loss % Mean (SE) | N (%)     | Weight Loss % Mean (SE) | N (%)     | Weight Loss % Mean (SE) |                |
| Less than 5        | 617 (29%) | -4.37 (0.21)            | 322 (26%) | -4.20 (0.31)            | 295 (35%) | -4.55 (0.30)            | 0.415          |
| 5 to 10            | 405 (19%) | -4.66 (0.24)            | 249 (20%) | -4.42 (0.31)            | 156 (18%) | -5.04 (0.39)            | 0.209          |
| 10 to 15           | 297 (14%) | -5.11 (0.29)            | 191 (15%) | -5.02 (0.38)            | 106 (12%) | -5.28 (0.46)            | 0.654          |
| 15 to 20           | 247 (12%) | -5.46 (0.32)            | 150 (12%) | -4.85 (0.39)            | 97 (11%)  | -6.41 (0.54)            | <b>0.020</b>   |
| 20 or more         | 547 (26%) | -8.10 (0.23)            | 341 (27%) | -7.77 (0.29)            | 206 (24%) | -8.56 (0.38)            | 0.097          |
| <i>p-value</i>     |           | <b>&lt; 0.0001</b>      |           | <b>&lt; 0.0001</b>      |           | <b>&lt; 0.0001</b>      |                |
